# Supplementary material for: Pharmacogenetics of MicroRNAs and MicroRNAs Biogenesis Machinery in Pediatric Acute Lymphoblastic Leukemia
Source: PubMed Central journal article supplement (PMC3948785; doi:10.1371/journal.pone.0091261), 2014-03-10
Supplement: pone.0091261.s001.pdf [file pone.0091261.s001.pdf]

**Table S1.** Single Nucleotide Polymorphisms selected in microRNA processing genes and selection criteria

| Gene           | SNP ID     | Alleles | Chr | Location  | Function       | Reason for selection |
|----------------|------------|---------|-----|-----------|----------------|----------------------|
| <i>CNOT1</i>   | rs11644694 | G>A     | 16  | 58557342  | non-synonymous | NS, SR               |
|                | rs11866002 | C>T     | 16  | 58587737  | synonymous     | SR                   |
|                | rs37060    | C>T     | 16  | 58566304  | intronic       | SR                   |
| <i>CNOT2</i>   | rs10506586 | C>A     | 12  | 70715490  | non-synonymous | NS, SR               |
| <i>CNOT3</i>   | rs42318    | G>A     | 19  | 54657069  | non-synonymous | NS                   |
| <i>CNOT4</i>   | rs1003226  | T>C     | 7   | 135046552 | 3'UTR          | SR                   |
|                | rs3763425  | C>T     | 7   | 135195320 | upstream       | UR                   |
|                | rs3812265  | C>T     | 7   | 135048804 | non-synonymous | NS, SR               |
| <i>CNOT6</i>   | rs11738060 | T>A     | 5   | 180004154 | 3'UTR          | MIRTS                |
|                | rs6877400  | T>C     | 5   | 179996111 | synonymous     | SR                   |
|                | rs1640299  | T>G     | 22  | 20098359  | 3'UTR          | BIB                  |
| <i>DGCR8</i>   | rs35987994 | T>C     | 22  | 20074006  | non-synonymous | NS                   |
|                | rs3757     | G>A     | 22  | 20099331  | 3'UTR          | MIRTS, BIB           |
|                | rs417309   | G>A     | 22  | 20098544  | 3'UTR          | 3UTR BIB             |
| <i>DICER1</i>  | rs9606248  | A>G     | 22  | 20087539  | intronic       | BIB                  |
|                | rs1057035  | T>C     | 14  | 95554142  | 3'UTR          | MIRTS                |
|                | rs1209904  | C>T     | 14  | 95563712  | intronic       | BIB                  |
| <i>DROSHA</i>  | rs13078    | T>A     | 14  | 95556747  | 3'UTR          | 3UTR, BIB            |
|                | rs3742330  | A>G     | 14  | 95553362  | 3'UTR          | BIB                  |
|                | rs10035440 | T>C     | 5   | 31539463  | upstream       | BIB                  |
| <i>EIF2C1</i>  | rs10719    | C>T     | 5   | 31401447  | 3'UTR          | 3UTR, BIB            |
|                | rs17408716 | A>G     | 5   | 31467952  | intronic       | BIB                  |
|                | rs2287584  | T>C     | 5   | 31423007  | synonymous     | SR, BIB              |
| <i>EIF2C2</i>  | rs3792830  | T>C     | 5   | 31416248  | intronic       | BIB                  |
|                | rs3805500  | T>C     | 5   | 31462977  | intronic       | BIB                  |
|                | rs4867329  | A>C     | 5   | 31435627  | intronic       | BIB                  |
| <i>GEMIN4</i>  | rs493760   | T>C     | 5   | 31437040  | intronic       | BIB                  |
|                | rs55656741 | G>A     | 5   | 31515657  | non-synonymous | NS, SR               |
|                | rs639174   | C>T     | 5   | 31433647  | intronic       | BIB                  |
| <i>EIF2C1</i>  | rs6877842  | G>C     | 5   | 31532638  | upstream       | BIB                  |
|                | rs6884823  | G>A     | 5   | 31491121  | intronic       | BIB                  |
|                | rs7719666  | C>T     | 5   | 31520778  | intronic       | BIB                  |
| <i>EIF2C2</i>  | rs7735863  | G>A     | 5   | 31486540  | intronic       | BIB                  |
|                | rs595961   | A>G     | 1   | 36367780  | intronic       | BIB                  |
|                | rs636832   | G>A     | 1   | 36363475  | intronic       | BIB                  |
| <i>DDX20</i>   | rs2292778  | C>T     | 1   | 141568622 | synonymous     | SR                   |
|                | rs2293939  | G>A     | 1   | 141551407 | synonymous     | SR                   |
|                | rs4961280  | C>A     | 1   | 141647414 | upstream       | UR, BIB              |
| <i>GEMIN5</i>  | rs197388   | T>A     | 1   | 112297482 | upstream       | UR, BIB              |
|                | rs197412   | T>C     | 1   | 112308953 | non-synonymous | NS, BIB              |
|                | rs197414   | C>A     | 1   | 112309123 | non-synonymous | NS, BIB              |
| <i>PIWIL1</i>  | rs563002   | T>C     | 1   | 112317135 | downstream     | BIB                  |
|                | rs1062923  | T>C     | 17  | 649067    | non-synonymous | NS, BIB              |
|                | rs2740348  | G>C     | 17  | 649935    | non-synonymous | NS, BIB              |
| <i>RAN</i>     | rs34610323 | C>T     | 17  | 648546    | non-synonymous | NS                   |
|                | rs3744741  | C>T     | 17  | 649232    | non-synonymous | NS, BIB              |
|                | rs7813     | C>T     | 17  | 648186    | non-synonymous | NS, BIB              |
| <i>SMAD5</i>   | rs910924   | C>T     | 17  | 655920    | 5'UTR          | 5UTR, BIB            |
|                | rs1974777  | A>G     | 5   | 154291409 | non-synonymous | NS                   |
|                | rs6865950  | G>A     | 5   | 154275786 | non-synonymous | NS                   |
| <i>SND1</i>    | rs816736   | T>C     | 5   | 154271948 | synonymous     | SR                   |
|                | rs1106042  | G>A     | 12  | 130841638 | non-synonymous | NS, SR, BIB          |
|                | rs11061209 | G>A     | 12  | 131364988 | downstream     | BIB                  |
| <i>TARBP2P</i> | rs14035    | C>T     | 12  | 131361241 | 3'UTR          | MIRTS, BIB           |
|                | rs3764941  | A>C     | 5   | 135469527 | non-synonymous | NS, SR               |
|                | rs3764942  | G>A     | 5   | 135469500 | intronic       | SR                   |
| <i>XPO5</i>    | rs17151639 | A>G     | 7   | 127637816 | non-synonymous | NS                   |
|                | rs17676986 | C>T     | 7   | 127636958 | intronic       | TR                   |
|                | rs322825   | C>T     | 7   | 127721507 | synonymous     | SR                   |
| <i>TNRC6A</i>  | rs3823994  | T>A     | 7   | 127669857 | intronic       | SR                   |
|                | rs6497759  | G>A     | 16  | 24801737  | non-synonymous | NS                   |
|                | rs139919   | T>C     | 22  | 40726183  | 3'UTR          | MIRTS                |
| <i>TNRC6B</i>  | rs2413621  | T>C     | 22  | 40673999  | intronic       | SR                   |
|                | rs470113   | A>G     | 22  | 40729614  | 3'UTR          | MIRTS                |
|                | rs4821943  | A>G     | 22  | 40722745  | 3'UTR          | MIRTS                |
| <i>TARBP2P</i> | rs9611280  | G>A     | 22  | 40552119  | non-synonymous | NS, SR               |
|                | rs784567   | C>T     | 12  | 53894465  | upstream       | BIB                  |
|                | rs1106841  | A>C     | 6   | 43496662  | synonymous     | SR                   |
| <i>XPO5</i>    | rs2227301  | G>A     | 6   | 43485283  | downstream     | BIB                  |
|                | rs2257082  | C>T     | 6   | 43492578  | synonymous     | SR, BIB              |
|                | rs34324334 | C>T     | 6   | 43535018  | non-synonymous | NS, SR               |
|                | rs7755135  | C>T     | 6   | 43490809  | 3'UTR          | MIRTS                |

3UTR: 3'UTR regulation; 5UTR: 5'UTR regulation; BIB: Bibliographic; MIRTS: miRNA target site; NS: non-synonymous; SR: Splicing regulation; UR: Upstream regulation.
