# Supplementary material for: Pharmacogenetics of MicroRNAs and MicroRNAs Biogenesis Machinery in Pediatric Acute Lymphoblastic Leukemia
Source: PubMed Central journal article supplement (PMC3948785; doi:10.1371/journal.pone.0091261), 2014-03-10
Supplement: pone.0091261.s002.pdf [file pone.0091261.s002.pdf]

**Table S2.** Characteristics of the Single Nucleotide Polymorphisms in microRNAs

| <b>Gene</b> | <b>SNP ID</b> | <b>Alleles</b> | <b>Chr</b> | <b>Location</b> | <b>Position</b>             |
|-------------|---------------|----------------|------------|-----------------|-----------------------------|
| mir-106b    | rs72631827    | G>T            | 7          | 99691652        | premature                   |
| mir-1178    | rs7311975     | T>C            | 12         | 120151493       | premature                   |
| mir-1206    | rs2114358     | T>C            | 8          | 129021179       | premature                   |
| mir-1255b-1 | rs6841938     | G>A            | 4          | 36428048        | mature                      |
| mir-1265    | rs11259096    | T>C            | 10         | 14478618        | premature                   |
| mir-1269    | rs73239138    | G>A            | 4          | 67142620        | mature                      |
| mir-1274a   | rs318039      | C>T            | 5          | 41475766        | premature                   |
| mir-1282    | rs11269       | G>T            | 15         | 44085909        | premature                   |
| mir-1294    | rs13186787    | A>G            | 5          | 153726769       | premature                   |
| mir-1302-4  | rs10173558    | T>C            | 2          | 208133995       | premiRNA<br>flanking region |
| mir-1307    | rs7911488     | A>G            | 10         | 105154089       | premature                   |
| mir-146a    | rs2910164     | G>C            | 5          | 159912418       | premature                   |
| mir-149     | rs2292832     | C>T            | 2          | 241395503       | premature                   |
| mir-154     | rs41286570    | G>A            | 14         | 101526127       | mature                      |
| mir-16-1    | rs72631826    | T>C            | 13         | 50623143        | premature                   |
| mir-1908    | rs174561      | T>C            | 11         | 61582708        | premature                   |
| Mir-196a-2  | rs11614913    | C>T            | 12         | 54385599        | premature                   |
| mir-2053    | rs10505168    | A>G            | 8          | 113655752       | premature                   |
| mir-2110    | rs17091403    | C>T            | 10         | 115933905       | premature                   |
| mir-216a    | rs41291179    | A>T            | 2          | 56216090        | premature                   |
| mir-220a    | rs72631817    | T>C            | X          | 122696014       | premature                   |
| mir-222     | rs72631825    | G>A            | X          | 45606471        | premature                   |
| mir-27a     | rs895819      | T>C            | 19         | 13947292        | premature                   |
| mir-300     | rs12894467    | C>T            | 14         | 101507727       | premature                   |
| mir-423     | rs6505162     | A>C            | 17         | 28444183        | premature                   |
| mir-449b    | rs10061133    | A>G            | 5          | 54466544        | mature                      |
| mir-453     | rs56103835    | T>C            | 14         | 101522556       | premature                   |
| mir-492     | rs2289030     | C>G            | 12         | 95228286        | premature                   |
| mir-499     | rs3746444     | T>C            | 20         | 33578251        | seed                        |
| mir-548a-1  | rs12197631    | T>G            | 6          | 18572056        | premature                   |
| mir-548h-3  | rs9913045     | G>A            | 12         | 13446924        | mature                      |
| mir-548h-4  | rs73235382    | A>T            | 8          | 26906437        | premature                   |
| mir-577     | rs34115976    | C>G            | 4          | 115577997       | premature                   |
| mir-585     | rs62376934    | G>A            | 5          | 168690612       | premature                   |
| mir-595     | rs4909237     | C>T            | 7          | 158325503       | premature                   |
| mir-603     | rs11014002    | C>T            | 10         | 24564653        | premature                   |
| mir-604     | rs2368392     | C>T            | 10         | 29834003        | premature                   |
| mir-604     | rs2368393     | T>C            | 10         | 29833998        | premature                   |
| mir-605     | rs2043556     | A>G            | 10         | 53059406        | premature                   |
| mir-608     | rs4919510     | C>G            | 10         | 102734778       | mature                      |
| mir-612     | rs12803915    | G>A            | 11         | 65211979        | premature                   |
| mir-612     | rs550894      | G>T            | 11         | 65211940        | premature                   |
| mir-618     | rs2682818     | C>A            | 12         | 81329536        | premature                   |
| mir-624     | rs11156654    | T>A            | 14         | 31483955        | premiRNA<br>flanking region |
| mir-656     | rs58834075    | C>T            | 14         | 101533093       | premature                   |
| mir-943     | rs1077020     | T>C            | 4          | 1988193         | premature                   |
