# Supplementary material for: Pharmacogenetics of MicroRNAs and MicroRNAs Biogenesis Machinery in Pediatric Acute Lymphoblastic Leukemia
Source: PubMed Central journal article supplement (PMC3948785; doi:10.1371/journal.pone.0091261), 2014-03-10
Supplement: pone.0091261.s003.pdf [file pone.0091261.s003.pdf]

**Table S3.** SNPs excluded from the miRNAs pathway association study.

| <b>SNP ID</b> | <b>Gene</b>   | <b>Alleles</b> | <b>Reason for exclusion</b> |
|---------------|---------------|----------------|-----------------------------|
| rs1003226     | <i>CNOT4</i>  | T>C            | Genotyping failure          |
| rs11738060    | <i>CNOT6</i>  | T>A            | Genotyping failure          |
| rs34610323    | <i>GEMIN4</i> | C>T            | Genotyping failure          |
| rs73239138    | mir-1269      | G>A            | Genotyping failure          |
| rs318039      | mir-1274a     | C>T            | Genotyping failure          |
| rs72631826    | mir-16-1      | T>C            | Genotyping failure          |
| rs72631825    | mir-222       | G>A            | Genotyping failure          |
| rs12197631    | mir-548a-1    | T>G            | Genotyping failure          |
| rs11014002    | mir-603       | C>T            | Genotyping failure          |
| rs2368392     | mir-604       | C>T            | Genotyping failure          |
| rs11061209    | <i>RAN</i>    | G>A            | Genotyping failure          |
| rs493760      | <i>DROSHA</i> | T>C            | Genotyping failure          |
| rs42318       | <i>CNOT3</i>  | G>A            | No HWE                      |
| rs3757        | <i>DGCR8</i>  | G>A            | No HWE                      |
| rs3742330     | <i>DICER1</i> | A>G            | No HWE                      |
| rs7813        | <i>GEMIN4</i> | C>T            | No HWE                      |
| rs910924      | <i>GEMIN4</i> | C>T            | No HWE                      |
| rs816736      | <i>GEMIN5</i> | T>C            | No HWE                      |
| rs2292832     | mir-149       | C>T            | No HWE                      |
| rs174561      | mir-1908      | T>C            | No HWE                      |
| rs4919510     | mir-608       | C>G            | No HWE                      |
| rs11156654    | mir-624       | T>A            | No HWE                      |
| rs55656741    | <i>DROSHA</i> | G>A            | No HWE                      |
| rs7719666     | <i>DROSHA</i> | C>T            | No HWE                      |
| rs2413621     | <i>TNRC6B</i> | T>C            | No HWE                      |
| rs470113      | <i>TNRC6B</i> | A>G            | No HWE                      |
