# Supplementary material for: Pharmacogenetics of MicroRNAs and MicroRNAs Biogenesis Machinery in Pediatric Acute Lymphoblastic Leukemia
Source: PubMed Central journal article supplement (PMC3948785; doi:10.1371/journal.pone.0091261), 2014-03-10
Supplement: pone.0091261.s004.pdf [file pone.0091261.s004.pdf]

**Table S4.** Full list of significant associations between polymorphisms in biogenesis machinery and toxicity parameters.

| Gene          | SNP        | Toxicity           | Phase | Genotype | No toxicity n (%) | Toxicity n (%) | OR (95% CI)       | p-value |
|---------------|------------|--------------------|-------|----------|-------------------|----------------|-------------------|---------|
| <i>DROSHA</i> | rs639174   | Vomits             | Cons  | CC       | 47 (92.2)         | 4 (7.8)        | 1.00              | 0.0003* |
|               |            |                    |       | CT/TT    | 43 (65.2)         | 23 (34.9)      | 6.28 (2.01-19.64) |         |
|               | rs2287584  | Vomits             | Cons  | TT       | 54 (88.5)         | 7 (11.5)       | 1.00              | 0.0026  |
|               |            |                    |       | CT/CC    | 41 (66.1)         | 21 (33.9)      | 3.95 (1.53-10.18) |         |
|               | rs10035440 | Hyperbilirubinemia | Ind   | TT       | 41 (65.1)         | 22 (34.9)      | 1.00              | 0.0455  |
|               |            |                    |       | CT/CC    | 54 (80.6)         | 13 (19.4)      | 0.45 (0.20-1.00)  |         |
|               | rs4867329  | Vomits             | Cons  | TT/CT    | 104 (94.6)        | 6 (5.5)        | 1.00              | 0.0405  |
|               |            |                    |       | CC       | 9 (75.0)          | 3 (25.0)       | 5.78 (1.23-27.06) |         |
|               | rs3805500  | Hepatic toxicity   | Cons  | AA/AG    | 70 (68.0)         | 33 (32.0)      | 1.00              | 0.0091  |
|               |            |                    |       | GG       | 17 (94.4)         | 1 (5.6)        | 0.12 (0.02-0.98)  |         |
|               | rs10719    | Vomits             | Cons  | AA       | 41 (89.1)         | 5 (10.9)       | 1.00              | 0.0137  |
|               |            |                    |       | AG/GG    | 53 (70.7)         | 22 (29.3)      | 3.40 (1.19-9.76)  |         |
|               | rs7735863  | Hepatic toxicity   | Cons  | GG       | 56 (83.6)         | 11 (16.4)      | 1.00              | 0.0259  |
|               |            |                    |       | AG/AA    | 35 (66.0)         | 18 (34.0)      | 2.62 (1.11-6.19)  |         |
|               | rs6877842  | Diarrhea           | Ind   | GG/AG    | 77 (63.6)         | 44 (36.4)      | 1.00              | 0.0279  |
|               |            |                    |       | AA       | 9 (100)           | 0 (0.0)        | NE (NE-NE)        |         |
|               | rs7735863  | Hepatic toxicity   | Cons  | GG       | 58 (66.7)         | 29 (33.3)      | 1.00              | 0.0266  |
|               |            |                    |       | AG/AA    | 30 (85.7)         | 5 (14.3)       | 0.33 (0.12-0.95)  |         |
|               | rs6877842  | Hepatic toxicity   | Cons  | GG       | 73 (92.4)         | 6 (7.6)        | 1.00              | 0.0359  |
|               |            |                    |       | GC/CC    | 39 (79.6)         | 10 (20.4)      | 3.12 (1.05-9.23)  |         |
|               | rs34324334 | Hyperbilirubinemia | Ind   | GG       | 59 (77.6)         | 17 (22.4)      | 1.00              | 0.0405  |
|               |            |                    |       | CG/CC    | 27 (60.0)         | 18 (40.0)      | 2.31 (1.04-5.17)  |         |
| <i>XPO5</i>   | rs34324334 | Hepatic toxicity   | Cons  | CC       | 101 (88.6)        | 13 (11.4)      | 1.00              | 0.0011  |
|               |            |                    |       | CT       | 7 (50.0)          | 7 (50.0)       | 7.77 (2.35-25.7)  |         |
|               | rs7755135  | Mucositis          | Ind   | CC       | 73 (68.2)         | 34 (31.8)      | 1.00              | 0.0101  |
|               |            |                    |       | CT       | 14 (100)          | 0 (0.0)        | NE (NE-NE)        |         |
| <i>TNRC6A</i> | rs6497759  | Hepatic toxicity   | Ind   | GG       | 68 (73.9)         | 24 (26.1)      | 1.00              | 0.0251  |
|               |            |                    |       | AG/AA    | 33 (89.2)         | 4 (10.8)       | 2.68 (1.14-6.32)  |         |
| <i>TNRC6B</i> | rs9611280  | Hepatic toxicity   | Cons  | GG       | 63 (76.8)         | 19 (23.2)      | 1.00              | 0.0013  |
|               |            |                    |       | AG/AA    | 23 (48.9)         | 24 (51.1)      | 3.46 (1.60-7.46)  |         |
|               | rs139919   | Mucositis          | Cons  | GG       | 70 (67.3)         | 34 (32.7)      | 1.00              | 0.0042  |
|               |            |                    |       | AG       | 19 (95.0)         | 1 (5.0)        | 0.11 (0.01-0.84)  |         |
|               | rs11866002 | Mucositis          | Ind   | TT       | 73 (86.9)         | 11 (13.1)      | 1.00              | 0.0327  |
|               |            |                    |       | CT/CC    | 36 (100)          | 0 (0.0)        | NE (NE-NE)        |         |
| <i>CNOT1</i>  | rs11866002 | Hepatic toxicity   | Cons  | CC/CT    | 98 (81.7)         | 22 (18.3)      | 1.00              | 0.0056  |
|               |            |                    |       | TT       | 4 (40.0)          | 6 (60.0)       | 6.68 (1.74-25.70) |         |
|               | rs37060    | Hepatic toxicity   | Ind   | CC       | 38 (63.3)         | 22 (36.7)      | 1.00              | 0.0480  |
|               |            |                    |       | CT/TT    | 50 (79.4)         | 13 (20.6)      | 0.45 (0.20-1.00)  |         |
|               | rs37060    | Hyperbilirubinemia | Ind   | GG       | 47 (77.1)         | 14 (22.9)      | 1.00              | 0.0152  |
|               |            |                    |       | AG/AA    | 40 (57.1)         | 30 (42.9)      | 2.52 (1.18-5.39)  |         |
|               | rs197388   | Renal toxicity     | Ind   | GG       | 56 (91.8)         | 5 (8.2)        | 1.00              | 0.0193  |
|               |            |                    |       | AG/AA    | 54 (77.1)         | 16 (22.9)      | 3.32 (1.14-9.69)  |         |
| <i>DDX20</i>  | rs197388   | Renal toxicity     | Ind   | AA/AT    | 121 (97.6)        | 3 (2.4)        | 1.00              | 0.0068  |
|               |            |                    |       | TT       | 3 (60.0)          | 2 (40.0)       | 26.89 (3.21-225)  |         |
|               | rs563002   | Hyperbilirubinemia | Cons  | TT       | 73 (96.1)         | 3 (3.9)        | 1.00              | 0.0252  |
|               |            |                    |       | CT/CC    | 37 (84.1)         | 7 (15.9)       | 4.60 (1.12-18.84) |         |
| <i>GEMIN4</i> | rs3744741  | Hepatic toxicity   | Ind   | CC       | 70 (73.7)         | 25 (26.3)      | 1.00              | 0.0080  |
|               |            |                    |       | CT/TT    | 17 (48.6)         | 18 (51.4)      | 2.96 (1.33-6.63)  |         |
|               | rs1062923  | MTX clearance      | Cons  | AA       | 73 (71.6)         | 29 (28.4)      | 1.00              | 0.0191  |
|               |            |                    |       | AG/GG    | 15 (48.4)         | 16 (51.6)      | 2.69 (1.18-6.13)  |         |
|               | rs595961   | Vomits             | Ind   | AA       | 74 (81.3)         | 17 (18.7)      | 1.00              | 0.0366  |
|               |            |                    |       | AG/GG    | 20 (62.5)         | 12 (37.5)      | 2.61 (1.07-6.35)  |         |
| <i>EIF2C1</i> | rs595961   | Mucositis          | Cons  | AA       | 67 (79.8)         | 17 (20.2)      | 1.00              | 0.0086  |
|               |            |                    |       | AG/GG    | 24 (57.1)         | 18 (42.9)      | 2.96 (1.31-6.65)  |         |
|               | rs3812265  | Mucositis          | Ind   | AA       | 70 (87.5)         | 10 (12.5)      | 1.00              | 0.0294  |
|               |            |                    |       | AG/GG    | 39 (100)          | 0 (0.0)        | NE (NE-NE)        |         |
| <i>CNOT4</i>  | rs3812265  | Mucositis          | Cons  | CC       | 61 (72.6)         | 23 (27.4)      | 1.00              | 0.0129  |
|               |            |                    |       | CT/TT    | 39 (90.7)         | 4 (9.3)        | 0.27 (0.09-0.85)  |         |
|               | rs3812265  | Mucositis          | Cons  | CC       | 74 (94.9)         | 4 (5.1)        | 1.00              | 0.0183  |
|               |            |                    |       | CT/TT    | 34 (81.0)         | 8 (19.1)       | 4.35 (1.23-15.5)  |         |

**Table S4 continuation.** Full list of significant associations between polymorphisms in biogenesis machinery and toxicity parameters.

| Gene           | SNP       | Toxicity       | Phase | Genotype | No toxicity n (%) | Toxicity n (%) | OR (95% CI)       | p      |
|----------------|-----------|----------------|-------|----------|-------------------|----------------|-------------------|--------|
| <i>TARBP2P</i> | rs784567  | Vomits         | Ind   | GG/AG    | 66 (68.8)         | 30 (31.3)      | 1.00              | 0.0131 |
|                |           |                |       | AA       | 27 (90.0)         | 3 (10.0)       | 0.24 (0.07-0.87)  |        |
| <i>DICER1</i>  | rs1209904 | Diarrhea       | Cons  | CC       | 58 (98.3)         | 1 (1.7)        | 1.00              | 0.0141 |
|                |           |                |       | CT/TT    | 56 (87.5)         | 8 (12.5)       | 8.29 (1.00-68.39) |        |
|                | rs13078   | Diarrhea       | Cons  | TT       | 68 (97.1)         | 2 (2.9)        | 1.00              | 0.0255 |
|                |           |                |       | AT/AA    | 45 (86.5)         | 7 (13.8)       | 5.29 (1.05-26.62) |        |
|                |           | MTX clearance  | Cons  | TT       | 57 (72.2)         | 22 (27.9)      | 1.00              | 0.0400 |
|                |           |                |       | AT/AA    | 29 (54.7)         | 24 (45.3)      | 2.14 (1.03-4.45)  |        |
| <i>SND1</i>    | rs3823994 | MTX clearance  | Cons  | AA/AT    | 84 (68.9)         | 38 (31.2)      | 1.00              | 0.0165 |
|                |           |                |       | TT       | 4 (33.3)          | 8 (66.7)       | 4.42 (1.25-15.58) |        |
|                | rs322825  | Mucositis      | Ind   | CC       | 39 (69.6)         | 17 (30.4)      | 1.00              | 0.0394 |
|                |           |                |       | CT/TT    | 62 (84.9)         | 11 (15.1)      | 0.41 (0.17-0.96)  |        |
| <i>DGCR8</i>   | rs417309  | Renal toxicity | Ind   | GG/AG    | 125 (96.9)        | 4 (3.1)        | 1.00              | 0.0346 |
|                |           |                |       | AA       | 0 (0.0)           | 1 (100)        | NE (NE-NE)        |        |

Ind: induction. Cons: consolidation

\*p-value<0.05 after FDR correction
