# Supplementary material for: Pharmacogenetics of MicroRNAs and MicroRNAs Biogenesis Machinery in Pediatric Acute Lymphoblastic Leukemia
Source: PubMed Central journal article supplement (PMC3948785; doi:10.1371/journal.pone.0091261), 2014-03-10
Supplement: pone.0091261.s005.pdf [file pone.0091261.s005.pdf]

**Table S5.** Full list of significant associations between polymorphisms in pre-miRNAs and toxicity parameters.

| Gene       | SNP        | Toxicity           | Phase | Genotype  | No toxicity<br>n(%) | Toxicity<br>n(%)  | OR (95% CI)       | p-value |
|------------|------------|--------------------|-------|-----------|---------------------|-------------------|-------------------|---------|
| mir-300    | rs12894467 | Hepatic toxicity   | Ind   | CC/CT     | 82 (71.9)           | 32 (28.1)         | 1.00              | 0.0038  |
|            |            |                    |       | TT        | 5 (33.3)            | 10 (66.8)         | 5.12 (1.63-16.16) |         |
|            |            | Hyperbilirubinemia | Ind   | CC/CT     | 99 (86.8)           | 15 (13.2)         | 1.00              | 0.0174  |
|            |            |                    |       | TT        | 9 (60.0)            | 6 (40.0)          | 4.40 (1.37-14.13) |         |
| mir-449b   | rs10061133 | Renal toxicity     | Ind   | AA        | 111 (98.2)          | 2 (1.8)           | 1.00              | 0.0132  |
|            |            |                    |       | GA/GG     | 15 (83.3)           | 3 (16.7)          | 11.10 (1.71-71.9) |         |
| mir-453    | rs56103835 | Vomits             | Cons  | AA        | 66 (83.5)           | 13 (16.5)         | 1.00              | 0.0141  |
|            |            |                    |       | GA/GG     | 28 (63.6)           | 16 (36.4)         | 2.90 (1.23-6.82)  |         |
|            |            | MTX clearance      | Cons  | AA        | 62 (72.1)           | 24 (27.9)         | 1.00              | 0.0297  |
|            |            |                    | GA/GG | 25 (53.2) | 22 (46.8)           | 2.27 (1.08-4.77)  |                   |         |
| mir-2053   | rs10505168 | Mucositis          | Cons  | TT        | 43 (82.7)           | 9 (17.3)          | 1.00              | 0.0154  |
|            |            |                    |       | CT/CC     | 68 (95.8)           | 3 (4.2)           | 0.21 (0.05-0.82)  |         |
| mir-423    | rs6505162  | Diarrhea           | Ind   | CC        | 25 (75.8)           | 8 (24.2)          | 1.00              | 0.0240  |
|            |            |                    |       | AC/AA     | 88 (91.7)           | 8 (8.3)           | 0.28 (0.10-0.83)  |         |
| mir-1307   | rs7911488  | Diarrhea           | Ind   | AA/AG     | 100 (90.1)          | 11 (9.9)          | 1.00              | 0.0241  |
|            |            |                    |       | GG        | 10 (66.7)           | 5 (33.3)          | 4.55 (1.31-15.72) |         |
|            |            | Mucositis          | Ind   | AA        | 44 (88.0)           | 6 (12.0)          | 1.00              | 0.0311  |
|            |            |                    | AG/GG | 55 (72.4) | 21 (27.6)           | 2.80 (1.04-7.54)  |                   |         |
| mir-618    | rs2682818  | Hyperbilirubinemia | Ind   | CC/AC     | 110 (85.4)          | 19 (14.7)         | 1.00              | 0.0247  |
|            |            |                    |       | AA        | 0 (0.0)             | 2 (100.0)         | NE (NE- NE)       |         |
| mir-146a   | rs2910164  | Diarrhea           | Ind   | GG        | 70 (93.3)           | 5 (6.7)           | 1.00              | 0.0251  |
|            |            |                    |       | CG/CC     | 45 (80.4)           | 11 (19.6)         | 3.42 (1.11-10.50) |         |
|            |            | Mucositis          | Ind   | GG        | 64 (85.3)           | 11 (14.7)         | 1.00              | 0.0309  |
|            |            |                    | CG/CC | 39 (69.6) | 17 (30.4)           | 2.54 (1.08-5.97)  |                   |         |
| mir-1206   | rs2114358  | Mucositis          | Cons  | AA/AG     | 96 (92.3)           | 8 (7.7)           | 1.00              | 0.0254  |
|            |            |                    |       | GG        | 15 (75.0)           | 5 (25.0)          | 4.57 (1.28-16.28) |         |
|            |            | Diarrhea           | Cons  | AA/AG     | 98 (95.2)           | 5 (4.9)           | 1.00              | 0.0365  |
|            |            |                    | GG    | 16 (80.0) | 4 (20.0)            | 4.90 (1.49-20.21) |                   |         |
| mir-577    | rs34115976 | Hyperbilirubinemia | Ind   | CC        | 67 (78.8)           | 18 (21.2)         | 1.00              | 0.0261  |
|            |            |                    |       | CG/GG     | 41 (93.2)           | 3 (6.8)           | 0.27 (0.08-0.98)  |         |
| mir-604    | rs2368393  | Renal toxicity     | Cons  | AA        | 65 (95.6)           | 3 (4.4)           | 1.00              | 0.0271  |
|            |            |                    |       | AG/GG     | 47 (83.9)           | 9 (16.1)          | 4.15 (1.07-16.15) |         |
| mir-492    | rs2289030  | Vomits             | Ind   | GG        | 90 (76.3)           | 28 (23.7)         | 1.00              | 0.0282  |
|            |            |                    |       | CG        | 6 (46.2)            | 7 (53.9)          | 3.75(1.16-12.08)  |         |
| mir-27a    | rs895819   | Hyperbilirubinemia | Ind   | TT        | 46 (92.0)           | 4 (8.0)           | 1.00              | 0.0320  |
|            |            |                    |       | CT/CC     | 61 (78.2)           | 17 (21.8)         | 3.20 (1.01-10.17) |         |
| mir-196a-2 | rs11614913 | Diarrhea           | Ind   | CC/CT     | 101 (90.2)          | 11 (9.8)          | 1.00              | 0.0407  |
|            |            |                    |       | TT        | 12 (70.6)           | 5 (29.4)          | 3.83 (1.14-12.89) |         |
| mir-1294   | rs13186787 | Hyperbilirubinemia | Cons  | AA        | 110 (93.2)          | 8 (6.8)           | 1.00              | 0.0424  |
|            |            |                    |       | AG        | 3 (60.0)            | 2 (40.0)          | 9.17 (1.33-63.01) |         |
| mir-656    | rs58834075 | Hyperbilirubinemia | Ind   | GG        | 105 (86.1)          | 17 (13.9)         | 1.00              | 0.0426  |
|            |            |                    |       | GA        | 3 (50.0)            | 3 (50.0)          | 6.18(1.15-33.15)  |         |
| mir-2110   | rs17091403 | Vomits             | Cons  | CC        | 84 (80.0)           | 21 (20.0)         | 1.00              | 0.0471  |
|            |            |                    |       | CT        | 11 (57.9)           | 8 (42.1)          | 2.91 (1.04-8.14)  |         |

Ind: induction. Cons: consolidation
